# Supplementary material
Source: PubMed Central journal article supplement (PMC3019095)
Supplement: NIHMS258526-supplement-Supplemental.pdf [file NIHMS258526-supplement-Supplemental.pdf]

## SUPPLEMENTARY INFORMATION

Figure S1

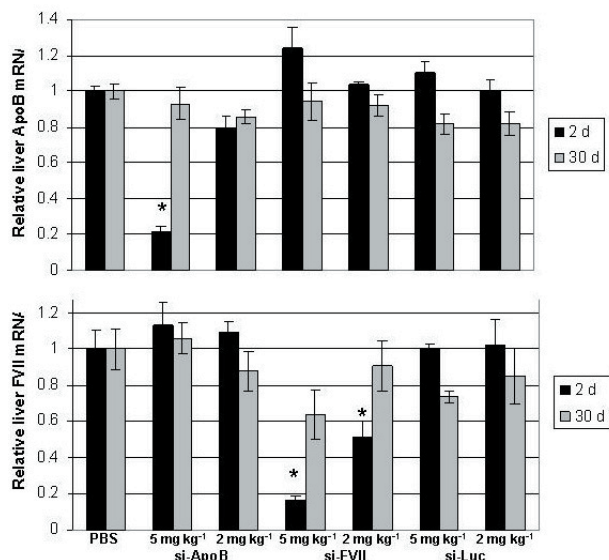

**Figure S1: ApoB and Factor VII are effectively silenced in mouse liver.** **a,b**, Mouse liver *ApoB* (**a**) and *Factor VII* (**b**) mRNA levels normalized to *Cyclophilin* mRNA measured 2 days (2d) and 30 days (30d) after i.v. injections of phosphate buffered saline (PBS) or two different doses (5 mg kg<sup>-1</sup> and 2 mg kg<sup>-1</sup>) of formulated siRNA targeting *ApoB* (si-ApoB), *Factor VII* (si-FVII) or *Luciferase* (si-Luc) (n=3 per group). Data are shown as mean±s.d.; asterisks denote statistical significance with p<0.01.

Figure S2

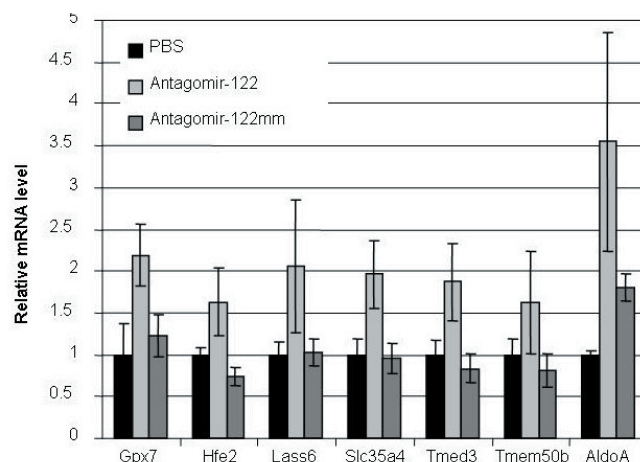

**Figure S2: Liver mRNA levels of miR-122 targets are increased by antagomir treatment.** Mouse liver *AldoA*, *Hfe2*, *Tmed3*, *Lass6*, *lc35a4*, *Tmem50b* and *Gpx7* mRNA levels normalized to *Gapdh* mRNA measured 24 hr after three i.v. injections of 80 mg kg<sup>-1</sup> cholesterol-conjugated RNA directed against miR-122 (antagomir-122), 80 mg kg<sup>-1</sup> mismatch control (antagomir-122mm) or phosphate buffered saline (PBS) (n=6 per group). Data are shown as mean±s.d.

Figure S3

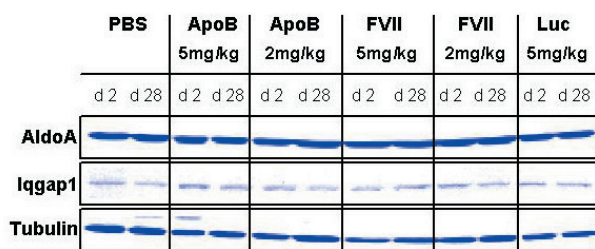

**Figure S3: Liver protein levels of miR-122 targets are unaffected by siRNA treatment.** Mouse liver protein levels of miR-122 targets *AldoA* and *Iqgap1* were measured by Western analysis in liver lysates from siRNA- and PBS-treated animals. Tubulin levels were measured to ensure equivalent protein loading.

**Figure S4: Long-term silencing of SCAP in hamster liver by repeat administration of siRNA.** **a**, Hamster liver *SCAP* mRNA levels normalized to  $\beta$ -actin mRNA measured seven days after three weekly i.v. injections of PBS, or 2.5 mg kg<sup>-1</sup> formulated siRNA targeting *SCAP* (si-SCAP) or a mismatch control siRNA (si-SCAPmm). Data are shown as mean±s.d.; asterisk denotes statistical significance with p<0.01. **b**, Pooled hamster liver *SCAP* protein levels analyzed by immunoblot at the same time point as in **a**. Levels of Receptor Associated Protein (RAP) were detected to control for protein loading.

Figure S4

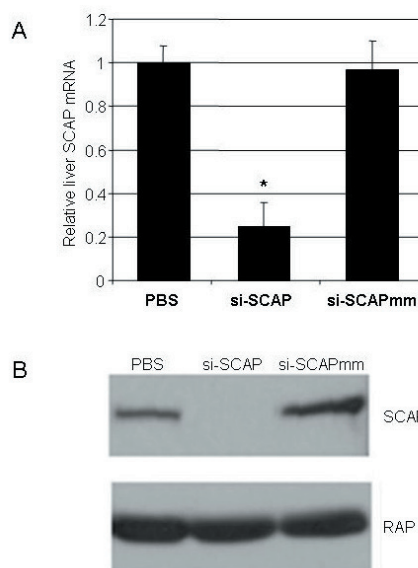

**Table S1: Relative quantitation of mouse liver miRNA levels by nuclease protection assay.** Mean values (±s.d.) for each treatment group are shown.

|        |     | PBS      | ApoB<br>5mg/kg | ApoB<br>2mg/kg | FVII<br>5mg/kg | FVII<br>2mg/kg | Luc<br>5mg/kg |
|--------|-----|----------|----------------|----------------|----------------|----------------|---------------|
| miR122 | d2  | 1.0±0.15 | 1.0±0.13       | 1.0±0.06       | 1.0±0.05       | 1.1±0.02       | 1.0±0.01      |
|        | d30 | 1.0±0.08 | 1.0±0.06       | 1.1±0.11       | 1.0±0.03       | 1.0±0.05       | 1.1±0.09      |
| miR16  | d2  | 1.0±0.03 | 1.0±0.04       | 1.1±0.04       | 1.0±0.07       | 1.0±0.03       | 0.9±0.01      |
|        | d30 | 1.0±0.01 | 1.0±0.03       | 0.9±0.05       | 1.0±0.04       | 1.0±0.03       | 1.0±0.05      |
| Let7a  | d2  | 1.0±0.03 | 0.8±0.02       | 0.8±0.07       | 0.8±0.02       | 0.8±0.01       | 0.8±0.04      |
|        | d30 | 1.0±0.04 | 1.0±0.05       | 1.0±0.03       | 0.9±0.08       | 0.9±0.06       | 1.0±0.02      |
